lobe-specific vs. systematic nodal dissection for clinical stage I-II non-small cell lung cancer (JCOG1413). *Jpn J Clin Oncol* 2018;48:190-4.

\*Corresponding author. Department of Thoracic Surgery, Sun Yat-sen University Cancer Center, No. 651, Dongfeng East Road, 510060 Guangzhou, Guangdong Province, China. Tel: +86-20-87343628; fax: +86-20-87343392; e-mail: yanghx@susucc.org.cn (H.-X. Yang).

doi:10.1093/ejcts/ezaa096

Advance Access publication 26 March 2020

## Is less more for early-stage non-small-cell lung cancer? Current evidence for performing segmentectomy

Han-Yu Deng and Xiaojun Tang\*

Lung Cancer Center, West China Hospital, Sichuan University, Chengdu, China

Received 14 January 2020; accepted 23 January 2020

**Keywords:** Segmentectomy • Lobectomy • Early-stage • Non-small-cell lung cancer

Recently, Winckelmans *et al.* [1] conducted a meta-analysis comparing the effect of segmentectomy with that of lobectomy in treating patients with early-stage non-small-cell lung cancer (NSCLC). They found that segmentectomy could yield long-term outcomes comparable to that of lobectomy, only in patients with stage IA NSCLC <2 cm, suggesting that segmentectomy might be a valuable alternative to lobectomy in tumours <2 cm whereas for larger tumours, lobectomy should remain as the first option. The authors are to be complimented for performing a subgroup analysis based on tumour size and for finding a unique group of patients with early-stage NSCLC (tumours <2 cm) who might be fit for segmentectomy. We quite agree with the authors that lobectomy should remain as the prior choice for treating NSCLC >2 cm, considering the high risk of intrapulmonary lymph node (LN) metastasis [2]. However, is less more in treating early-stage NSCLC <2 cm? As a matter of fact, previous similar meta-analyses comparing the effect of segmentectomy with lobectomy for NSCLC <2 cm yielded significantly conflicting results [1, 3]. Moreover, even by analysing the same Surveillance, Epidemiology, and End Results database, previous studies have also revealed significantly different results when comparing segmentectomy with lobectomy in the treatment of NSCLC <2 cm [1, 4]. Therefore, we believe that heterogeneity might exist even in NSCLC <2 cm. Hence, in our previous study, we analysed the pattern of intrapulmonary LN metastasis in cIA NSCLC and found that even in tumours <2 cm, significantly different patterns of intrapulmonary LN metastasis were observed: NSCLC  $\leq 1.5$  cm had a low rate of N1 (1.8%) and peripheral (12-14#) LN metastasis (1.8%) while NSCLC >1.5 but  $\leq 2$  cm had a relatively high rate of hilar (6.5%) and peripheral (12-14#) LN metastasis (18.3%) [5]. Therefore, in view of intrapulmonary LN metastasis, our study suggests that segmentectomy might be utilized for NSCLC  $\leq 1.5$  cm while for NSCLC >1.5 but  $\leq 2$  cm, lobectomy should still be preferred [5]. However, direct evidence from the Japanese trial (JCOG0802/WJOG4607L) and North American trial (CALGB140503) is still warranted [6].

## REFERENCES

- [1] Winckelmans T, Decaluwe H, De Leyn P, Van Raemdonck D. Segmentectomy or lobectomy for early-stage non-small-cell lung cancer: a systematic review and meta-analysis. *Eur J Cardiothorac Surg* 2020;57:1051-60.
- [2] Deng H-Y, Tang X, Zhou Q. Sublobar resection: an alternative to lobectomy in treating stage I non-small-cell lung cancer? *Eur J Cardiothorac Surg* 2020;57:613.

- [3] Liu Y, Huang C, Liu H, Chen Y, Li S. Sublobectomy versus lobectomy for stage IA (T1a) non-small-cell lung cancer: a meta-analysis study. *World J Surg Oncol* 2014;12:138.
- [4] Dai C, Shen J, Ren Y, Zhong S, Zheng H, He J *et al.* Choice of surgical procedure for patients with non-small-cell lung cancer  $\leq 1$  cm or >1 to 2 cm among lobectomy, segmentectomy, and wedge resection: a population-based study. *J Clin Oncol* 2016;34:3175-82.
- [5] Deng HY, Zhou J, Wang RL, Jiang R, Qiu XM, Zhu DX *et al.* Surgical choice for cIA non-small cell lung cancer: view from regional lymph node metastasis. *Ann Thorac Surg* 2019; doi: 10.1016/j.athoracsur.2019.10.056.
- [6] Deng HY. Sublobar resection for clinical IA non-small cell lung cancer: one size fits all? *Ann Surg Oncol* 2020;27:958-9

\*Corresponding author. Lung Cancer Center, West China Hospital, Sichuan University, No. 37 Guoxue Alley, Chengdu 610041, China. Tel: +86-18-008205601; fax: +86-28-86298139; e-mail: tangxiaojun73@163.com (X. Tang).

doi:10.1093/ejcts/ezaa044

Advance Access publication 24 February 2020

## Reply to Deng and Tang

Thomas Winckelmans <sup>a</sup>, Herbert Decaluwé<sup>b</sup>, Paul De Leyn<sup>b</sup> and Dirk Van Raemdonck <sup>b,\*</sup>

<sup>a</sup> Faculty of Medicine, KU Leuven, Leuven, Belgium;

<sup>b</sup> Department of Thoracic Surgery, University Hospitals Leuven, Leuven, Belgium

Received 20 January 2020; accepted 23 January 2020

**Keywords:** Non-small-cell lung cancer • Segmentectomy • Lobectomy • Limited resection

We thank Drs Deng and Tang [1] for critically reading our paper and for sharing their view on this topic. An interesting point is raised: when considering tumour size, at what point exactly should segmentectomy rather than lobectomy be recommended? While our paper suggested a role for segmentectomy in tumours <2 cm [2], others have found similar evidence for smaller or even larger tumour sizes, making this subject all the more controversial [3-4]. We believe heterogeneity plays a role in these conflicting results and, as suggested, this might still not be completely eliminated in our subgroup analysis of tumours <2 cm. Ideally, this group should be further divided into even smaller subgroups, but unfortunately evidence on these specific tumour sizes is currently limited. The view that segmentectomy might be more appropriate for tumours even smaller than suggested in our article is supported by the results of a recent evaluation of the Surveillance, Epidemiology, and End Results (SEER) database [5] where tumours <1 cm and 1-2 cm were analysed separately. We like to emphasize that besides tumour size, many other factors influence the decision to perform surgery. These include factors related to patient history, such as pulmonary function and comorbidities but also pathologic factors and radiologic features such as the location of the tumour within the segment and invasive characteristics of the lesion. We have to await the final results of the randomized trials before we can make stronger recommendations for daily practice based on a higher level of scientific evidence. Once again, many thanks for your letter and interest on this topic.

## REFERENCES

- [1] Deng H-Y, Tang X. Is less more for early-stage non-small cell lung cancer? Current evidence for performing segmentectomy. *Eur J Cardiothorac Surg* 2020;58:406.
- [2] Winckelmans T, Decaluwe H, De Leyn P, Van Raemdonck D. Segmentectomy or lobectomy for early-stage non-small-cell lung

cancer: a systematic review and meta-analysis. *Eur J Cardiothorac Surg* 2020;57:1051–60.

- [3] Fan J, Wang L, Jiang G-N, Gao W. Sublobectomy versus lobectomy for stage I non-small-cell lung cancer, a meta-analysis of published studies. *Ann Surg Oncol* 2012;19:661–8.
- [4] Hamatake D, Yoshida Y, Miyahara S, Yamashita SI, Shiraishi T, Iwasaki A. Surgical outcomes of lung cancer measuring less than 1 cm in diameter. *Interact CardioVasc Thorac Surg* 2012;15:854–8.
- [5] Qu X, Wang K, Zhang T, Shen H, Dong W, Liu Q *et al.* Long-term outcomes of stage I NSCLC ( $\leq 3$  cm) patients following segmentectomy are equivalent to lobectomy under analogous extent of lymph node removal: a PSM based analysis. *J Thorac Dis* 2017;9:4561–73.

\*Corresponding author. Department of Thoracic Surgery, University Hospitals Leuven, Herestraat 49, 3000 Leuven, Belgium. Tel: +32-16-346823; fax: +32-16-346824; e-mail: dirk.vanraemdonck@uzleuven.be (D. Van Raemdonck).

doi:10.1093/ejcts/ezaa046

Advance Access publication 24 February 2020

## Non-small-cell lung cancer with pathological complete response after induction therapy followed by surgical resection: which is the pattern of failure and which are the future perspectives?

Filippo Lococo \*, Marco Chiappetta, Alfredo Cesario and Stefano Margaritora

Department of Thoracic Surgery, Fondazione Policlinico Universitario "A. Gemelli", IRCCS, Università Cattolica del Sacro Cuore, Rome, Italy

Received 22 November 2019; accepted 2 January 2020

**Keywords:** Locally advanced non-small-cell lung cancer • Induction therapy • Pathological complete response • Immunotherapy

Melek *et al.* [1] recently reported an interesting retrospective analysis of a relatively large series of patients with non-small-cell lung cancer (NSCLC) in which they compared the long-term survival (LTS) rate of patients with early-stage NSCLC treated initially with surgery with that of patients in whom surgical resection was performed after induction chemoradiation. The authors correctly stated that ypTNM staging (restaging after induction treatment) (IT) remains the most important prognostic factor for patients who undergo surgery after IT. In this context, several authors [2–3] have suggested that the LTS rate of patients surgically treated after IT was worse in those staged after ypTNM compared to those staged after pTNM, even though the stages were substantially similar. In the subgroup of responders, those who experienced a pathological complete response (pCR) represented those with the best life expectancy. According to Melek *et al.* [1], patients who had a pCR had worse results than those who were stage 1a but had results similar to those who were stage 1b and better compared to those who were stages 2, 3 and 4, with an estimated 5-year survival rate of 72.2%. In line with these results, the authors suggested that this subgroup should be classified as stage 1b instead of stage 0, but strategy of care for and prognosis of this subpopulation are far from clear.

We wish to contribute to this debate by commenting on the paper by Melek *et al.* [1]. A few years ago, our research team reported in *EJCTS* a similar experience [2] on LTS in patients with NSCLC who underwent radical surgery after IT (195 locally advanced [LA] cases). Among them, pCR was achieved in a remarkable proportion of cases (37 patients, 27% of the surgical cohort); the 5-year LTS rate was 64%. Interestingly, among other prognostic factors, adjuvant therapy ( $P=0.005$ ) was found to be strongly prognostic for these patients (hazard ratio: 8.21, 95% confidence interval: 2.16–31.16;  $P=0.002$ ). Indeed, when evaluating the pattern of failure in

patients who had pCR, we observed that 46% of them experienced a recurrence, more frequently at a distant site (63%) than locally. Therefore, the combined approach (IT + surgery) guaranteed satisfactory local control of disease but suboptimal control at a distance. Similarly, in Melek's analysis [1], patients who had pCR had the potential for recurrence of up to 23.6%; the majority had distant metastases (70.6%) rather than local recurrence. This observation deserves special attention from physicians who are looking for a more accurate staging system (and accordingly, treatment) in this subpopulation. Indeed, if IT seems to "fail" in controlling metastatic disease, this situation provides the opportunity to include (when feasible) an adjuvant systemic treatment (the so-called sandwich protocol).

In this framework, immunotherapy could be of great help in the future in improving distant control of disease in different oncologic scenarios (including locally advanced NSCLC). Indeed, preliminary data from *in vivo* studies [4] have suggested that platinum-based chemotherapy increases the immunogenicity of NSCLC (increase of PDL1-expression before and after chemotherapy), which provides proof of the principle of applying it in combined approaches. Therefore, we could theorize in the not-too-distant future that a multimodal approach (immunotherapy together with chemotherapy and/or radiotherapy) could be applied in patients with locally advanced NSCLC, increasing the life expectancy in this subgroup of patients. We would greatly appreciate the authors' response to the points raised.

## REFERENCES

- [1] Melek H, Çetinkaya G, Özer E, Yentürk E, Sevinç TE, Bayram AS *et al.* Pathological complete response after neoadjuvant/induction treatment: where is its place in the lung cancer staging system? *Eur J Cardiothorac Surg* 2019;56:604–11.
- [2] Lococo F, Cesario A, Margaritora S, Dall'Armi V, Mattei F, Romano R *et al.* Long-term results in patients with pathological complete response after induction radiochemotherapy followed by surgery for locally advanced non-small-cell lung cancer. *Eur J Cardiothorac Surg* 2013;43:e71–81.
- [3] Kayawake H, Okumura N, Yamanashi K, Takahashi A, Itasaka S, Yoshioka H *et al.* Non-small cell lung cancer with pathological complete response: predictive factors and surgical outcomes. *Gen Thorac Cardiovasc Surg* 2019;67:773–81.
- [4] Fournel L, Wu Z, Stadler N, Damotte D, Lococo F, Boulle G *et al.* Cisplatin increases PD-L1 expression and optimizes immune checkpoint blockade in non-small cell lung cancer. *Cancer Lett* 2019;464:5–14.

\*Corresponding author. Department of Thoracic Surgery, Fondazione Policlinico Universitario "A. Gemelli", IRCCS, Università Cattolica del Sacro Cuore, Largo F. Vito, 00168 Rome, Italy. Tel: +39-0630151; fax: +39-69-7612152; email: filippo\_lococo@yahoo.it (F. Lococo).

doi:10.1093/ejcts/ezaa013

Advance Access publication 27 February 2020

## Reply to Lococo *et al.*

Huseyin Melek \*, Erhan Ozer, Ahmet Sami Bayram and Cengiz Gebitekin  
Thoracic Surgery Department, Faculty of Medicine, Uludag University, Bursa, Turkey

Received 1 January 2020; accepted 2 January 2020

**Keywords:** Pathological complete response • Induction treatment • Neoadjuvant treatment • Lung resection

Thank you for giving us an opportunity to reply to Lococo *et al.* [1]. There is still uncertainty pertaining to the indications, treatment options and
